# Supplementary material
Source: PubMed Central journal article supplement (PMC7074877)
Supplement: NIHMS1565533-supplement-Supporting_Information.pdf [file NIHMS1565533-supplement-Supporting_Information.pdf]

**The Longest Amyloid- $\beta$  Precursor Protein Intracellular Domain Produced with A $\beta$ 42 Forms  $\beta$ -sheet-containing Monomers that Self-assemble and are Proteolyzed by Insulin-degrading Enzyme**

Claire A. Krasinski, Qiuchen Zheng, Valerie A. Ivancic, Donald E. Spratt, and Noel D. Lazo\*

Carlson School of Chemistry and Biochemistry, Clark University, 950 Main Street, Worcester, Massachusetts 01610, United States

\*nlazo@clarku.edu

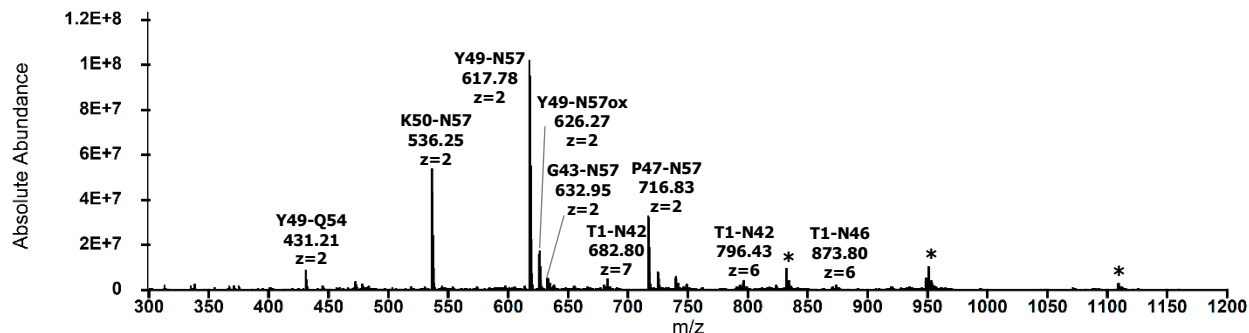

**Figure S1.** Representative mass spectrum of AICD57 after digestion by IDE for 6 hours showing that the *N*-terminal fragments T1–N42 and T1–N46 are resistant to proteolysis. Peaks of undigested AICD57 are labeled with asterisks.

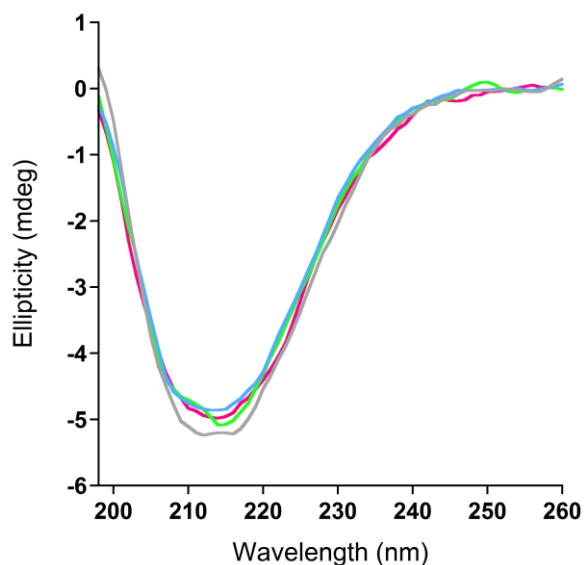

**Figure S2.** AICD57 contains  $\beta$ -sheet that is resistant to proteolytic attack by IDE. Circular dichroic spectra of AICD57 (20  $\mu$ M in 10 mM phosphate buffer (pH 7.4)) in the presence of IDE recorded immediately after sample preparation (magenta) and after 6 h (green), 22 h (blue), 6 days (gray) of incubation. The substrate to enzyme molar ratio used was 100:1.

**Table S1.** Peaks detected in mass spectra of AICD57 after digestion by IDE for one minute.

| <b>Fragment</b>   | <b>Observed m/z</b> | <b>Charge</b> | <b>Observed Mass (Da)</b> | <b>Theoretical Mass (Da)</b> | <b><math>\delta^*</math> (Da)</b> |
|-------------------|---------------------|---------------|---------------------------|------------------------------|-----------------------------------|
| Undigested AICD57 | 666.15              | 10            | 6651.50                   | 6650.70                      | 0.80                              |
|                   | 740.05              | 9             | 6651.45                   |                              | 0.75                              |
|                   | 832.30              | 8             | 6650.40                   |                              | -0.30                             |
|                   | 951.06              | 7             | 6650.42                   |                              | -0.28                             |
|                   | 1109.57             | 6             | 6651.42                   |                              | 0.72                              |
|                   | 1331.09             | 5             | 6650.45                   |                              | -0.25                             |
| T1-N42            | 597.58              | 8             | 4772.64                   | 4772.60                      | 0.04                              |
|                   | 682.80              | 7             | 4772.60                   |                              | 0.00                              |
|                   | 796.43              | 6             | 4772.58                   |                              | -0.02                             |
| G43-N57           | 632.95              | 3             | 1895.85                   | 1896.06                      | -0.21                             |
|                   | 948.92              | 2             | 1895.84                   |                              | -0.22                             |
| G43-N57ox         | 638.28              | 3             | 1911.84                   | 1896.06                      | 0.22                              |
|                   | 956.91              | 2             | 1911.82                   |                              | 0.24                              |
| Y44-N57           | 920.41              | 2             | 1838.82                   | 1839.01                      | -0.19                             |
|                   | 613.94              | 3             | 1838.82                   |                              | -0.19                             |
| T1-N46            | 655.47              | 8             | 5235.76                   | 5236.05                      | -0.29                             |
|                   | 748.97              | 7             | 5235.79                   |                              | -0.26                             |
|                   | 873.80              | 6             | 5236.80                   |                              | 0.75                              |
|                   | 1048.15             | 5             | 5235.75                   |                              | -0.30                             |
| P47-N57           | 478.22              | 3             | 1431.66                   | 1432.61                      | -0.95                             |
|                   | 716.83              | 2             | 1431.66                   |                              | -0.95                             |
| P47-N57ox         | 483.56              | 3             | 1447.68                   | 1448.61                      | -0.93                             |
|                   | 724.83              | 2             | 1447.66                   |                              | -0.95                             |
| P47-F52           | 401.71              | 2             | 801.42                    | 801.94                       | -0.52                             |
| K50-N57           | 536.25              | 2             | 1070.50                   | 1071.22                      | -0.72                             |
| Y49-N57           | 617.78              | 2             | 1233.56                   | 1234.39                      | -0.83                             |

\* $\delta$  = Observed Mass - Theoretical Mass

**Table S2.** Peaks detected in mass spectra of AICD57 after digestion by IDE for two hours.

| <b>Fragments</b>  | <b>Observed m/z</b> | <b>Charge</b> | <b>Observed Mass (Da)</b> | <b>Theoretical Mass (Da)</b> | <b><math>\delta^*</math> (Da)</b> |
|-------------------|---------------------|---------------|---------------------------|------------------------------|-----------------------------------|
| Undigested AICD57 | 666.15              | 10            | 6651.50                   | 6650.70                      | 0.80                              |
|                   | 740.05              | 9             | 6651.45                   |                              | 0.75                              |
|                   | 832.30              | 8             | 6650.40                   |                              | -0.30                             |
|                   | 951.06              | 7             | 6650.42                   |                              | -0.28                             |
|                   | 1109.57             | 6             | 6651.42                   |                              | 0.72                              |
|                   | 1331.09             | 5             | 6650.45                   |                              | -0.25                             |
| T1-N42            | 597.58              | 8             | 4772.64                   | 4772.60                      | 0.04                              |
|                   | 682.80              | 7             | 4772.60                   |                              | 0.00                              |
|                   | 796.43              | 6             | 4772.58                   |                              | -0.02                             |
| G43-N57           | 632.95              | 3             | 1895.85                   | 1896.06                      | -0.21                             |
|                   | 948.92              | 2             | 1895.84                   |                              | -0.22                             |
| G43-N57ox         | 638.28              | 3             | 1911.84                   | 1896.06                      | 0.22                              |
|                   | 956.91              | 2             | 1911.82                   |                              | 0.24                              |
| G43-Q54           | 761.85              | 2             | 1521.70                   | 1522.63                      | -0.93                             |
| Y44-Q54           | 733.34              | 2             | 1464.68                   | 1465.58                      | -0.90                             |
| Y44-N57           | 920.41              | 2             | 1838.82                   | 1839.01                      | -0.19                             |
|                   | 613.94              | 3             | 1838.82                   |                              | -0.19                             |
| T1-N46            | 655.47              | 8             | 5235.76                   | 5236.05                      | -0.29                             |
|                   | 748.97              | 7             | 5235.79                   |                              | -0.26                             |
|                   | 873.80              | 6             | 5236.80                   |                              | 0.75                              |
|                   | 1048.15             | 5             | 5235.75                   |                              | -0.30                             |
| P47-N57           | 478.22              | 3             | 1431.66                   | 1432.61                      | -0.95                             |
|                   | 716.83              | 2             | 1431.66                   |                              | -0.95                             |
| P47-N57ox         | 483.56              | 3             | 1447.68                   | 1448.61                      | -0.93                             |
|                   | 724.83              | 2             | 1447.66                   |                              | -0.95                             |
| P47-F52           | 401.71              | 2             | 801.42                    | 801.94                       | -0.52                             |
| N46-N57           | 773.85              | 2             | 1545.70                   | 1546.72                      | -1.02                             |
| K50-N57           | 536.25              | 2             | 1070.50                   | 1071.22                      | -0.72                             |
| Y49-N57           | 617.78              | 2             | 1233.56                   | 1234.39                      | -0.83                             |

\* $\delta$  = Observed Mass - Theoretical Mass

**Table S3.** Peaks detected in mass spectra of AICD57 after digestion by IDE for four hours.

| <b>Fragments</b>      | <b>Observed m/z</b> | <b>Charge</b> | <b>Observed Mass (Da)</b> | <b>Theoretical Mass (Da)</b> | <b><math>\delta^*</math> (Da)</b> |
|-----------------------|---------------------|---------------|---------------------------|------------------------------|-----------------------------------|
| Undigested AICD57     | 666.15              | 10            | 6651.50                   | 6650.70                      | 0.80                              |
|                       | 740.05              | 9             | 6651.45                   |                              | 0.75                              |
|                       | 832.30              | 8             | 6650.40                   |                              | -0.30                             |
|                       | 951.06              | 7             | 6650.42                   |                              | -0.28                             |
|                       | 1109.57             | 6             | 6651.42                   |                              | 0.72                              |
|                       | 1331.09             | 5             | 6650.45                   |                              | -0.25                             |
| T1-N42                | 597.58              | 8             | 4772.64                   | 4772.60                      | 0.04                              |
|                       | 682.80              | 7             | 4772.60                   |                              | 0.00                              |
|                       | 796.43              | 6             | 4772.58                   |                              | -0.02                             |
| G43-N57               | 632.95              | 3             | 1895.85                   | 1896.06                      | -0.21                             |
|                       | 948.92              | 2             | 1895.84                   |                              | -0.22                             |
| G43-N57 <sub>ox</sub> | 638.28              | 3             | 1911.84                   | 1896.06                      | 0.22                              |
|                       | 956.91              | 2             | 1911.82                   |                              | 0.24                              |
| G43-Q54               | 761.85              | 2             | 1521.70                   | 1522.63                      | -0.93                             |
| Y44-N57               | 920.41              | 2             | 1838.82                   | 1839.01                      | -0.19                             |
|                       | 613.94              | 3             | 1838.82                   |                              | -0.19                             |
| Y44-Q54               | 733.34              | 2             | 1464.68                   | 1465.58                      | -0.90                             |
| T1-N46                | 655.47              | 8             | 5235.76                   | 5236.05                      | -0.29                             |
|                       | 748.97              | 7             | 5235.79                   |                              | -0.26                             |
|                       | 873.80              | 6             | 5236.80                   |                              | 0.75                              |
|                       | 1048.15             | 5             | 5235.75                   |                              | -0.30                             |
| P47-N57               | 478.22              | 3             | 1431.66                   | 1432.61                      | -0.95                             |
|                       | 716.83              | 2             | 1431.66                   |                              | -0.95                             |
| P47-N57 <sub>ox</sub> | 483.56              | 3             | 1447.68                   | 1448.61                      | -0.93                             |
|                       | 724.83              | 2             | 1447.66                   |                              | -0.95                             |
| P47-F52               | 401.71              | 2             | 801.42                    | 801.94                       | -0.52                             |
| Y49-N57               | 617.78              | 2             | 1233.56                   | 1234.39                      | -0.83                             |
| K50-N57               | 536.25              | 2             | 1070.50                   | 1071.22                      | -0.72                             |

\* $\delta$  = Observed Mass - Theoretical Mass

**Table S4.** Peaks detected in mass spectra of AICD57 after digestion by IDE for six hours.

| <b>Fragments</b>  | <b>Observed m/z</b> | <b>Charge</b> | <b>Observed Mass (Da)</b> | <b>Theoretical Mass (Da)</b> | <b><math>\delta^*</math> (Da)</b> |
|-------------------|---------------------|---------------|---------------------------|------------------------------|-----------------------------------|
| Undigested AICD57 | 740.05              | 9             | 6651.45                   | 6650.70                      | 0.75                              |
|                   | 832.30              | 8             | 6650.40                   |                              | -0.30                             |
|                   | 951.06              | 7             | 6650.42                   |                              | -0.28                             |
|                   | 1109.57             | 6             | 6651.42                   |                              | 0.72                              |
|                   | 1331.09             | 5             | 6650.45                   |                              | -0.25                             |
| T1-N42            | 597.58              | 8             | 4772.64                   | 4772.60                      | 0.04                              |
|                   | 682.80              | 7             | 4772.60                   |                              | 0.00                              |
|                   | 796.43              | 6             | 4772.58                   |                              | -0.02                             |
| G43-N57           | 632.95              | 3             | 1895.85                   | 1896.06                      | -0.21                             |
| G43-N57ox         | 638.28              | 3             | 1911.84                   | 1896.06                      | 0.22                              |
|                   | 956.91              | 2             | 1911.82                   |                              | 0.24                              |
| Y44-N57           | 919.91              | 2             | 1837.82                   | 1839.01                      | -1.19                             |
|                   | 613.94              | 3             | 1838.82                   |                              | -0.19                             |
| T1-N46            | 655.60              | 8             | 5236.80                   | 5236.05                      | 0.75                              |
|                   | 748.97              | 7             | 5235.79                   |                              | -0.26                             |
|                   | 873.80              | 6             | 5236.80                   |                              | 0.75                              |
|                   | 1048.15             | 5             | 5235.75                   |                              | -0.30                             |
| P47-N57           | 478.22              | 3             | 1431.66                   | 1432.61                      | -0.95                             |
|                   | 716.83              | 2             | 1431.66                   |                              | -0.95                             |
| P47-N57ox         | 724.83              | 2             | 1447.66                   | 1448.61                      | -0.95                             |
| P47-F52           | 401.71              | 2             | 801.42                    | 801.94                       | -0.52                             |
| T1-T48            | 906.65              | 6             | 5433.90                   | 5434.27                      | -0.37                             |
| Y49-N57           | 617.78              | 2             | 1233.56                   | 1234.39                      | -0.83                             |
| Y49-N57ox         | 626.27              | 2             | 1250.54                   | 1250.39                      | 0.15                              |
| Y49-Q54           | 431.21              | 2             | 860.42                    | 860.96                       | -0.54                             |
| Y49-M55           | 496.73              | 2             | 992.16                    | 991.46                       | 0.70                              |
| K50-N57           | 536.25              | 2             | 1070.50                   | 1071.22                      | -0.72                             |

\* $\delta$  = Observed Mass - Theoretical Mass
